# Supplementary material for: Eu3+functionalized robust membranes based on the post-synthetic copolymerization of a metal–organic framework and ethyl methacrylate
Source: Royal Society of Chemistry journal article supplement (doi:10.1039/d1dt01037a), 2021-01-01
Supplement: d1dt01037a1.pdf [file d1dt01037a1.pdf]

## Supporting information

### **Eu<sup>3+</sup> functionalized robust membrane based on the post-synthetic copolymerization of metal-organic framework and ethyl methacrylate**

Jie Min<sup>a</sup>, Haifeng Lu<sup>\*,b</sup>, Bing Yan<sup>\*,a</sup>

<sup>a</sup> School of Chemical Science and Engineering, Tongji University, Siping Road 1239, Shanghai 200092, China.

<sup>b</sup> School of Chemistry and Chemical Engineering, Shandong University, South Shanda Road 27, Jinan 250100, P. R. China.

E-mail: lhf@sdu.edu.cn; byan@tongji.edu.cn.

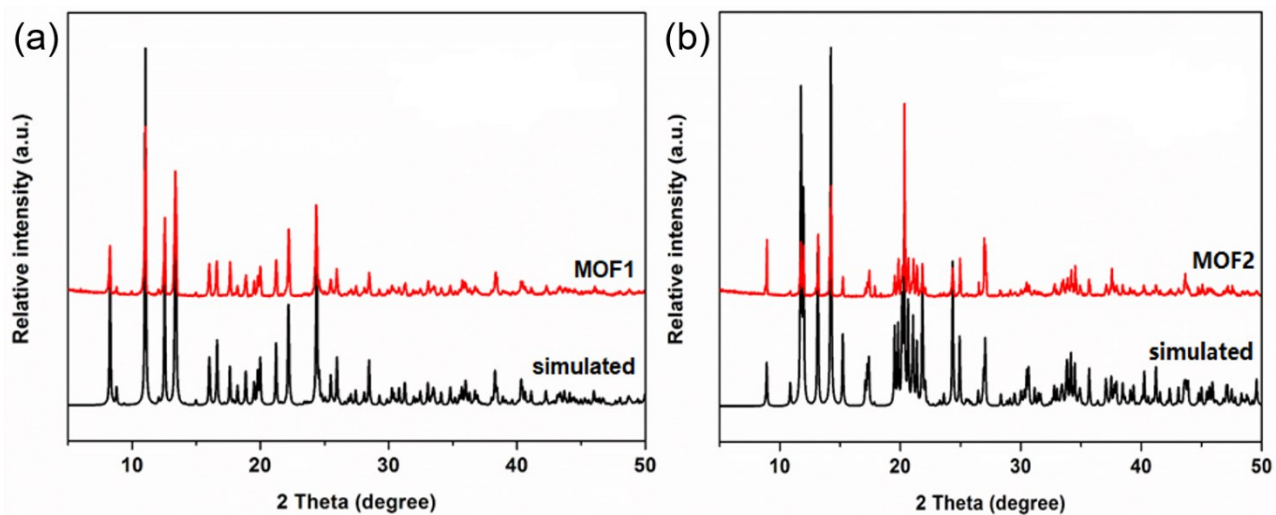

**Figure S1** PXRd patterns of solid-state (a) MOF1 and (b) MOF2.

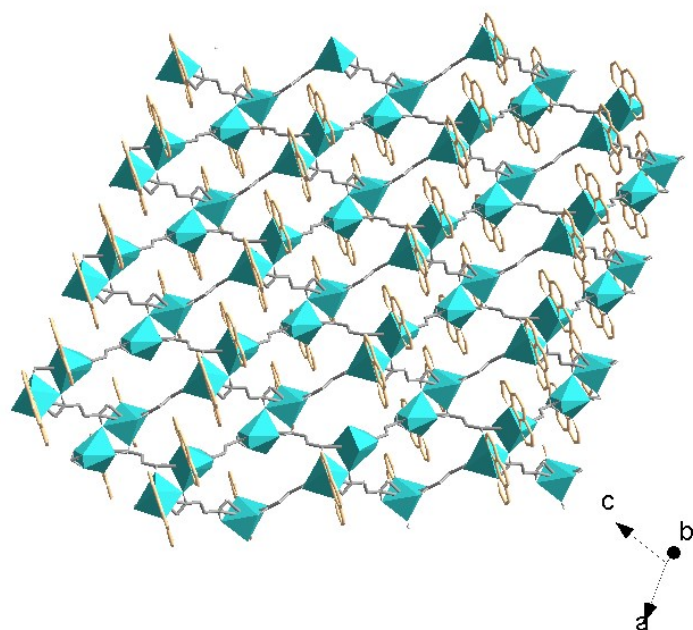

**Figure S2** The undulating network of MOF1 with polymerizable groups.

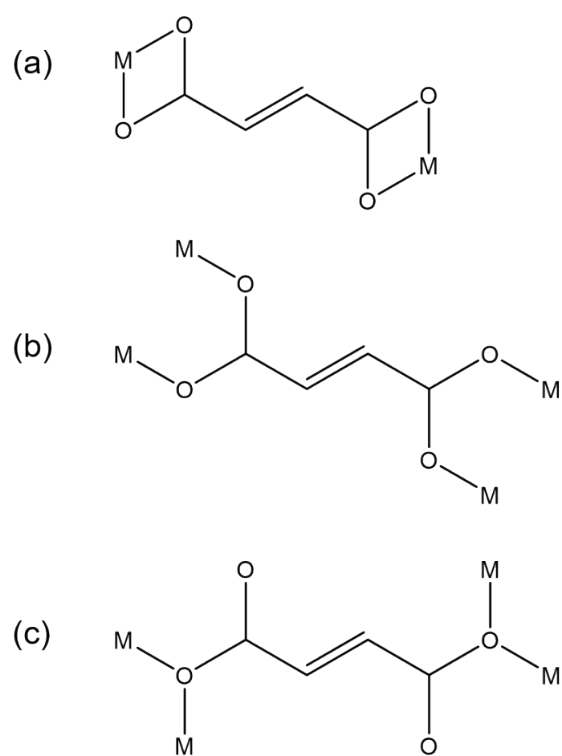

**Figure S3** The coordination modes of fma (fumaric acid) ligands in MOF1 and MOF2.

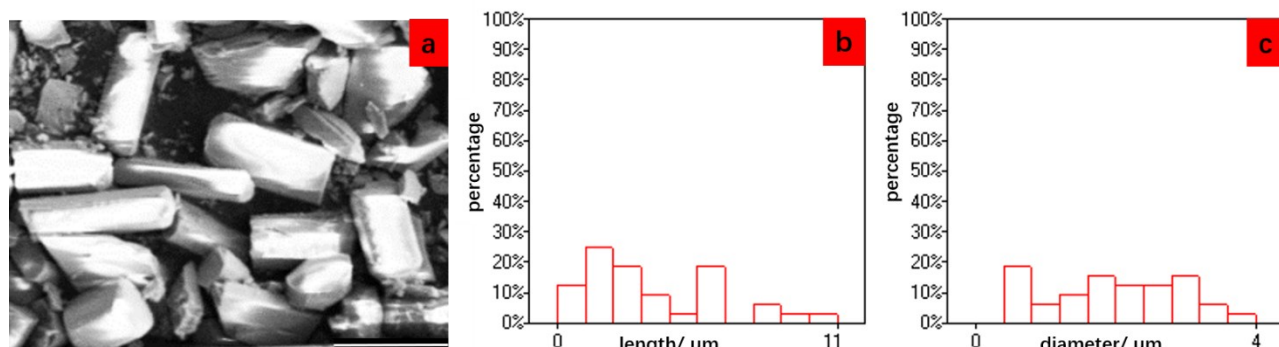

**Figure S4** (a) SEM image of MOF1 particles. (scale bar: 4 μm); corresponding length distribution (b) and diameter distribution (c).

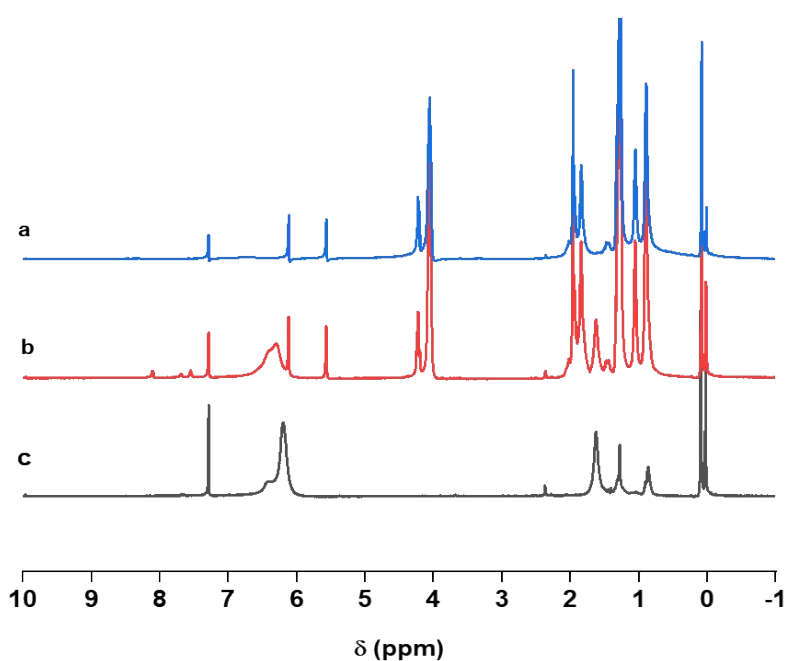

**Figure S5** The NMR analysis of (a) PEMA, (b) MOF1-Eu<sup>3+</sup>@PEMA membrane and (c) ligands of MOF1. The spectra were recorded with the solutions obtained by degrading corresponding material in HF/CDCl<sub>3</sub> (1/10, v/v).

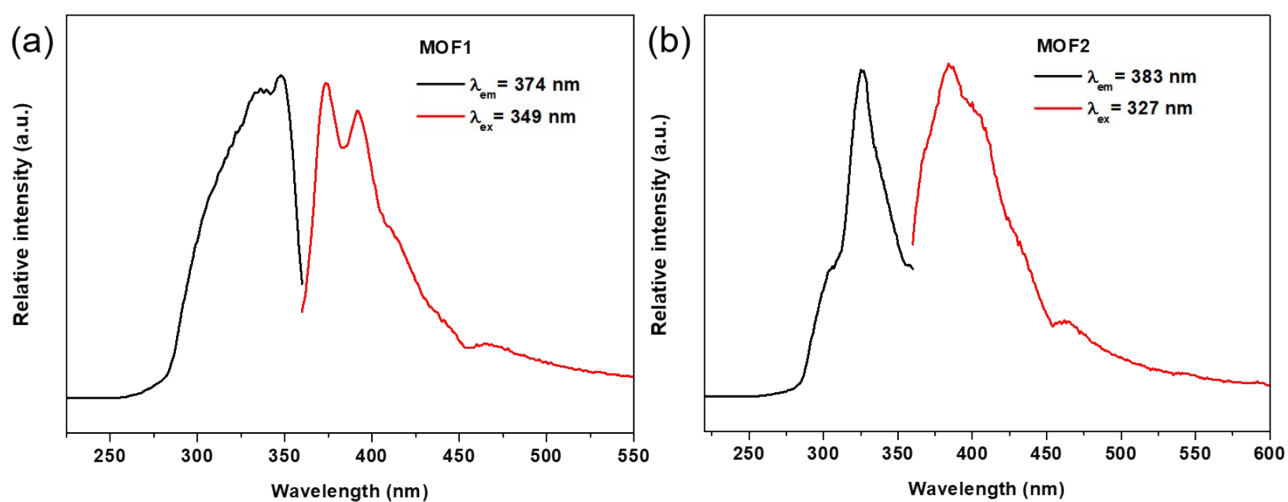

**Figure S6** Excitation and emission spectra of solid-state (a) MOF1 and (b) MOF2 at room temperature.

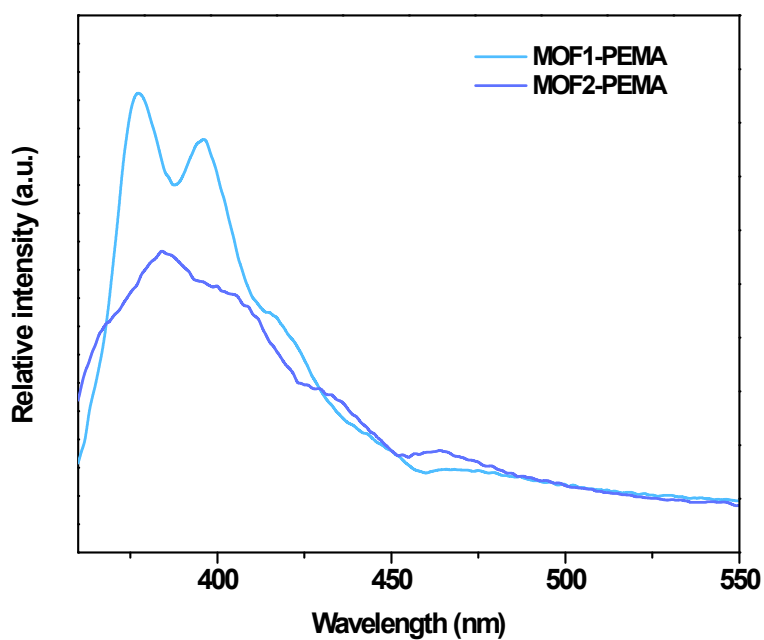

**Figure S7** Fluorescence emission of MOF1-PEMA membrane and MOF2-PEMA membrane at room temperature.

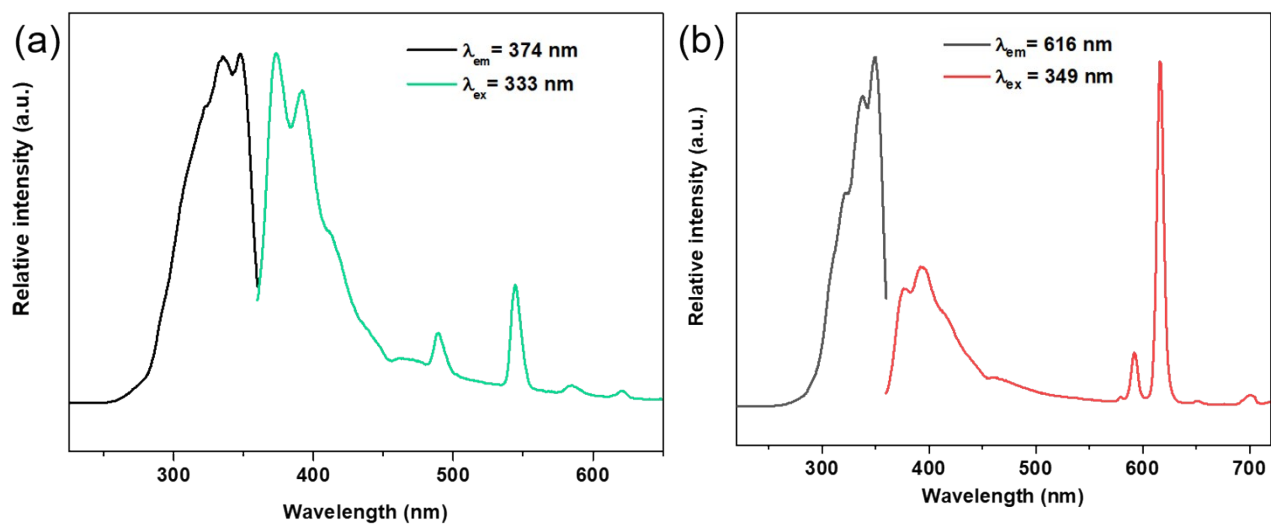

**Figure S8** Excitation and emission spectra of (a) MOF1-Tb<sup>3+</sup>@PEMA membrane and (b) MOF1-Eu<sup>3+</sup>@PEMA membrane at room temperature.

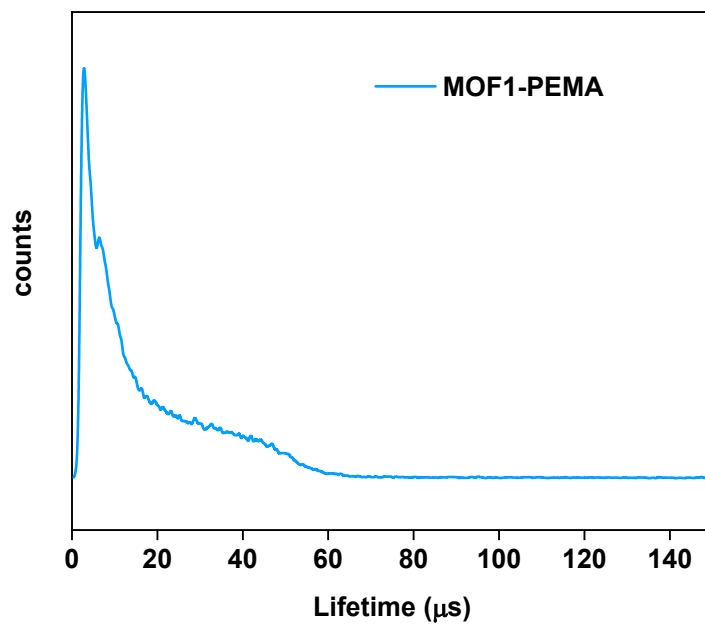

**Figure S9** Decay curve of MOF1-PEMA membrane monitored at its maximum emission wavelength of 374 nm.

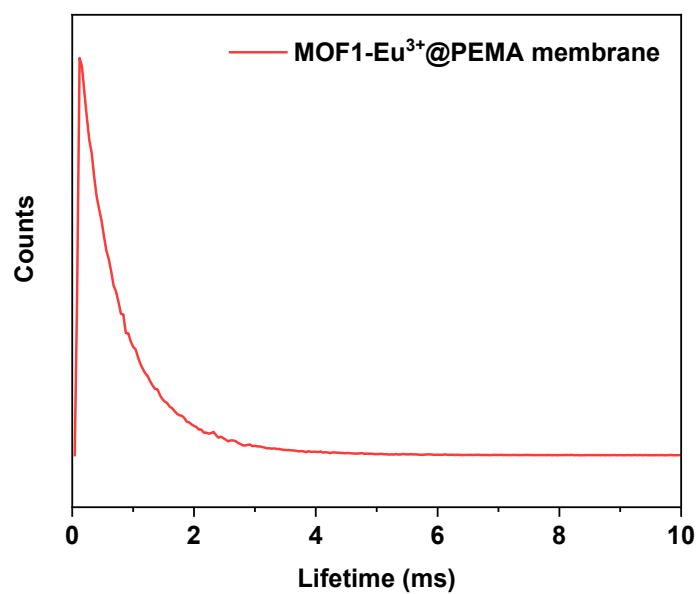

**Figure S10** Decay curve of MOF1-Eu<sup>3+</sup>@PEMA membrane monitored at its maximum emission wavelength of 616 nm.

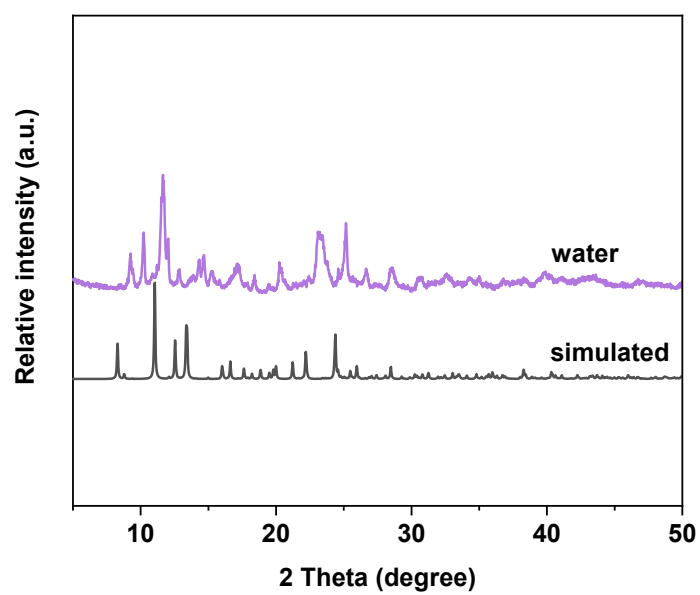

**Figure S11** PXRD profile of MOF1 powders after immersion in water for 24 hours.

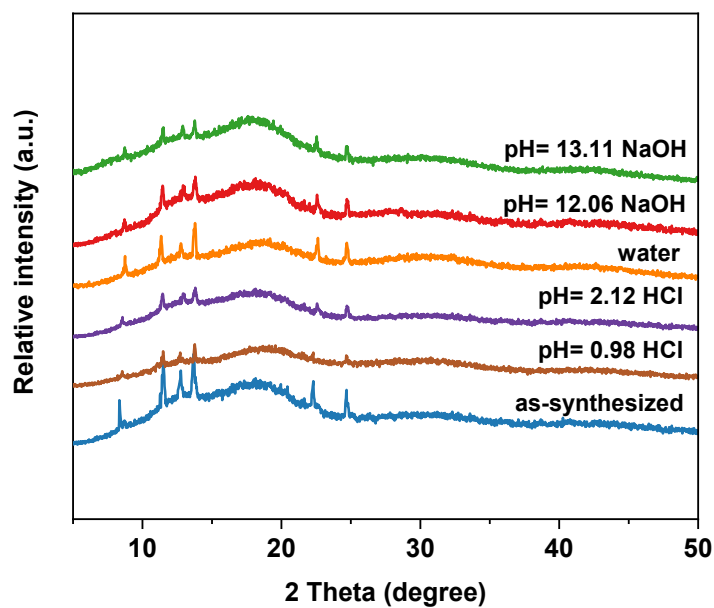

**Figure S12** PXRD patterns of MOF1-Eu<sup>3+</sup>@PEMA membrane after immersion in various pH aqueous solutions for 24 hours.

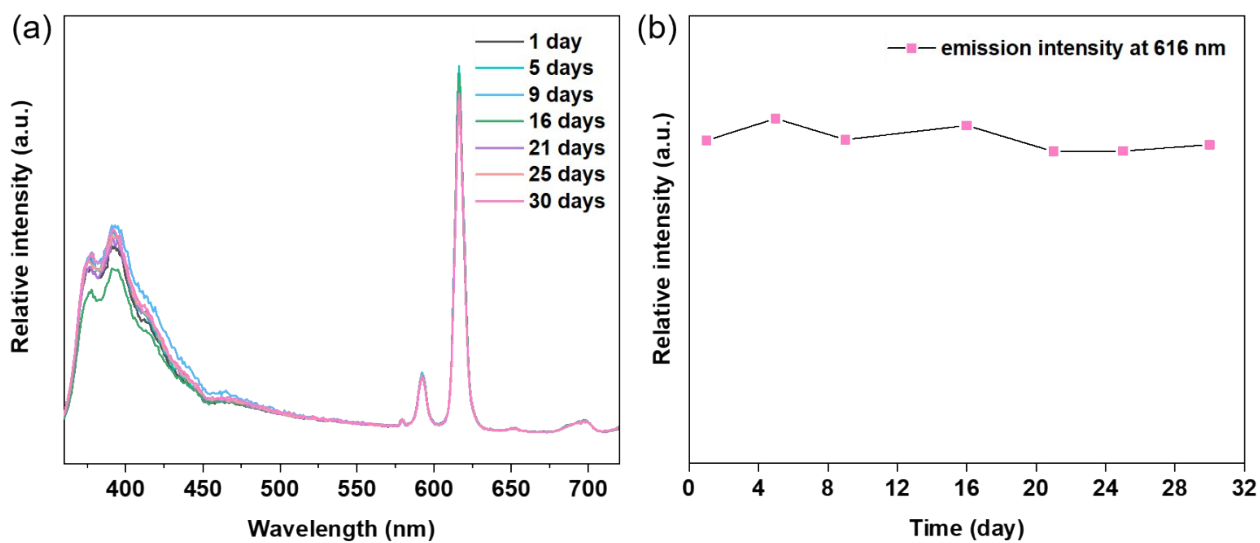

**Figure S13** (a) Day-to-day fluorescence stability of MOF1-Eu<sup>3+</sup>@PEMA membrane under excitation at 349 nm; (b) Corresponding variation of emission intensity at 616 nm with time.



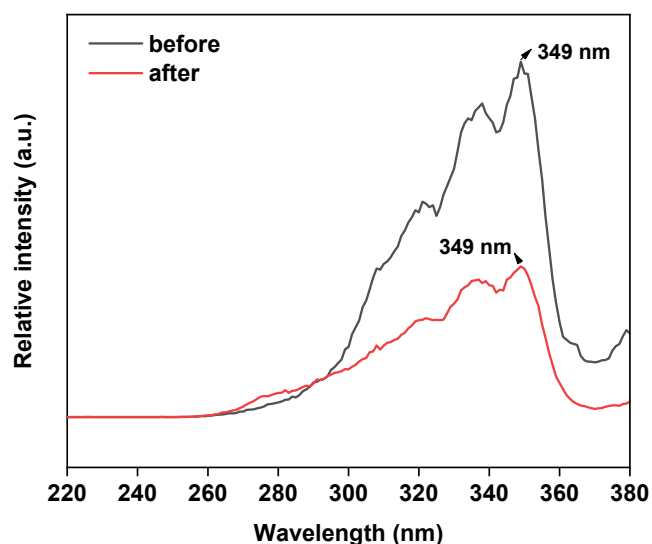

**Figure S14** Excitation spectra of MOF1-Eu<sup>3+</sup>@PEMA membrane before and after the 30 minutes exposure to gaseous toluene at 50 °C ( $\lambda_{em} = 616$  nm).

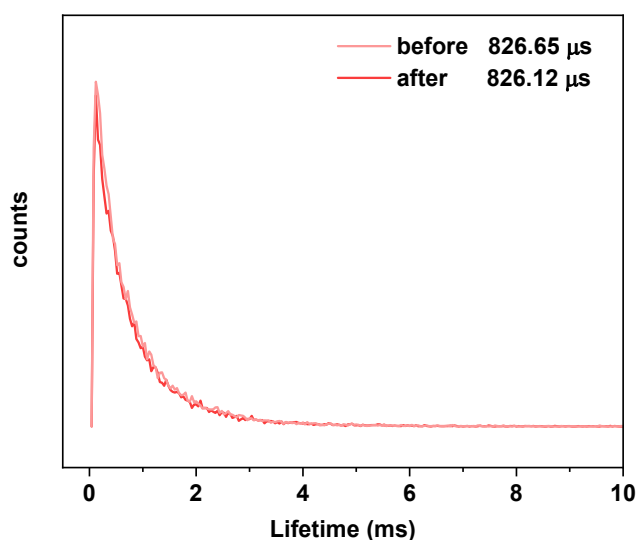

**Figure S15** Decay curves of MOF1-Eu<sup>3+</sup>@PEMA membrane before and after the 30 minutes exposure to gaseous toluene at 50 °C ( $\lambda_{em} = 616$  nm) under its maximum emission wavelength of 616 nm.
